# Supplementary material for: Allele-specific alternative splicing and its functional genetic variants in human tissues
Source: HighWire-hosted journal article supplement (doi:10.1101/gr.265637.120), 2021-01-15
Supplement: Supplemental_Table_S2.xlsx [file Supplemental_Table_S2.xlsx]

## Sheet: Supplemental Table S2
Supplemental Table S2. Primer sequences used in this study
Name	Sequence
Minigene primers
GFP-Fw	AGTGCTTCAGCCGCTACCC
GFP-Rv	GTTGTACTCCAGCTTGTGCC
PDE4DIP HindIII Fw	gagaagctt TCTGACTTGTCCATGTCCAGG
PDE4DIP SacII Rv	tatccgcgg GATGAGACATACACACCACAG
PDE4DIP FwT	CCTTAACTTTCTTTTCCTAGGCTTTC
PDE4DIP RvT	GAAAGCCTAGGAAAAGAAAGTTAAGG
PDE4DIP FwG	CCTTAACTTTCTGTTCCTAGGCTTTC
PDE4DIP RvG	GAAAGCCTAGGAACAGAAAGTTAAGG
MAP2K3 HindIII Fw	gagaagctt TGGAAGGAGTGAGAGGCAGGTG
MAP2K3 SacII Rv	tatccgcgg TCTCCCCTAGGGCTAGGATGAG
MAP2K3 FwG	CACCATTGGAGACAGAGTAGGTGCCAGC
MAP2K3 RvG	GCTGGCACCTACTCTGTCTCCAATGGTG
MAP2K3 FwC	CACCATTGGAGACACAGTAGGTGCCAGC
MAP2K3 RvC	GCTGGCACCTACTGTGTCTCCAATGGTG
UGT2B17 HindIII Fw	gagaagctt TGGGTATTCAGCTTACCTCAGAC
UGT2B17 SacII Rv	tatccgcgg GGAAGGACAGGTTACACATCATC
UGT2B17 FwA	CAATACTCGACTGTATAAGTGGTTACCCCAG
UGT2B17 RvA	CTGGGGTAACCACTTATACAGTCGAGTATTG
UGT2B17 FwG	CAATACTCGACTGTACAAGTGGTTACCCCAG
UGT2B17 RvG	CTGGGGTAACCACTTGTACAGTCGAGTATTG
SEPTIN4 EcoRI Fw	atgaattc CACTGCGACTTTGTGAAGCTGAG
SEPTIN4 XhoI Rv	atctcgagcta GCTTCTCAGTTTCTGGATCTGTC
SEPTIN4 FwT	CCTTATCAACCCTTTTCTCCCTTTAGC
SEPTIN4 RvT	GCTAAAGGGAGAAAAGGGTTGATAAGG
SEPTIN4 FwC	CCTTATCAACCCCTTTCTCCCTTTAGC
SEPTIN4 RvC	GCTAAAGGGAGAAAGGGGTTGATAAGG
PGGHG EcoRI Fw	gaattc GTCATGTCCCCCGACGAGTAC
PGGHG XhoI Rv	gactcgagcta CAGGCTCATACCCATCGAACTC
PGGHG FwA	CAAGATCCCCTCACCTCACCCCACCCCCGCCCCAG
PGGHG RvA	CTGGGGCGGGGGTGGGGTGAGGTGAGGGGATCTTG
PGGHG FwC	CAAGATCCCCTCACCTCCCCCCACCCCCGCCCCAG
PGGHG RvC	CTGGGGCGGGGGTGGGGGGAGGTGAGGGGATCTTG
ADAM15 HindIII Fw	gagaagctt CACCTCCCTGCTACCACTTC
ADAM15 SacII Rv	tatccgcgg GTGCACACACTCCCATCATC
ADAM15 FwA	ACGAGGCACTAAAGTGAGTCCTGG
ADAM15 RvA	CCAGGACTCACTTTAGTGCCTCGT
SCEL HindIII Fw	gagaagctt TGCTGCCTGCTTGGAGTGTTC
SCEL SacII Rv	tatccgcgg TTACTGTTTCCAGCAACATGC
SCEL FwA	TAAAAATATTACGAAGTAAGACATTTAAAG
SCEL RvA	CTTTAAATGTCTTACTTCGTAATATTTTTA
MOBP EcoRI Fw	gaggaattc TAGGCTCCTTTCTTGGGATG
MOBP SacII Rv	tatccgcgg CAGTGGGGAAGACACTGACC
MOBP FwA	CTGCTTCACTTTTAGAAAAAAAAAAAAAAG
MOBP RvA	CTTTTTTTTTTTTTTCTAAAAGTGAAGCAG
CAST HindIII Fw	gagaagctt TGGGGCTGCTGTTAAGAAAG
CAST SacII Rv	tatccgcgg GGGAAGCACTCAAGTGGAAG
CAST FwA	CTGCAGACTCTTCAGTGAGTTTACAT
CAST RvA	ATGTAAACTCACTGAAGAGTCTGCAG
KRT72 EcoRI Fw	gaggaattc TTTGGGCTCAGTCAAGACCTC
KRT72 SacII Rv	tatccgcgg GCTGTGCCTCCTCCATTTTGT
KRT72 FwT	GAATGTGAAGAAGCAAGTGGGTTCTATGAAA
KRT72 RvT	TTTCATAGAACCCACTTGCTTCTTCACATTC
PSMD13 EcoRI Fw	gagGAA TTC CTTTATGAAAACTTTATCAGTG
PSMD13 XhoI Rv	gatCTC GAG Cta AGTCATCTGTCTAACTACATG
PSMD13 FwA	GCGGTGCTCAAAGACTGGTGGCTTTTAT
PSMD13 RvA	ATAAAAGCCACCAGTCTTTGAGCACCGC
PSMD13 FwG3	TTTTCACTTTGAAGATGAGTGCATTG
PSMD13 RvG3	CAATGCACTCATCTTCAAAGTGAAAA
NDUFS7 EcoRI Fw	gagGAA TTC ATGATCGTGGCCGGCACACTC
NDUFS7 XhoI Rv	gatCTC GAG Cta CCCCATGGAGACCACGTAGCG
NDUFS7 FwC	GAGCTGCGCACGGCCCCCGCCTCTCTT
NDUFS7 RvC	AAGAGAGGCGGGGGCCGTGCGCAGCTC
RGL2 EcoRI Fw2	gagGAA TTC CCACGGGTGCTTCGGCCAAC
RGL2 XhoI Rv2	gatCTC GAG Cta CTCATCTCCCCCAGTACTGG
RGL2 FwT	GCTGGGGGGGGGTTTCTTGGGAC
RGL2 RvT	GTCCCAAGAAACCCCCCCCCAGC
EMSA oligoes
PDE4DIP T7FwG	TAATACGACTCACTATAGGGCATTTTAGGAGACTTGGACACAGTT
PDE4DIP T7RvG	AACTGTGTCCAAGTCTCCTAAAATGCCCTATAGTGAGTCGTATTA
PDE4DIP T7FwA	TAATACGACTCACTATAGGGCATTTTAGGAGATTTGGACACAGTT
PDE4DIP T7RvA	AACTGTGTCCAAATCTCCTAAAATGCCCTATAGTGAGTCGTATTA
NPLOC4 T7FwG	TAATACGACTCACTATAGGGCCATTGGAGACACAGTAGGTGCCAG
NPLOC4 T7RvG	CTTCACTCCATCCGGGGACTGGACACCCTATAGTGAGTCGTATTA
NPLOC4 T7FwA	TAATACGACTCACTATAGGGTGTCCAGTCCCCAGATGGAGTGAAG
NPLOC4 T7RvA	CTTCACTCCATCTGGGGACTGGACACCCTATAGTGAGTCGTATTA
BUD13 cloning primers
BUD13 NotI Fw	AAGGTGCGGCCGCaa GCGGCAGCTCCGCCGCTTTC
BUD13 EcoRI Rv	gta gaattc CATATCCTCAACACTCCATTTGTAG
